# Supplementary material for: Orientation-dependent induced-charge electrophoresis of magnetic metal-coated Janus particles with different coating thicknesses
Source: Royal Society of Chemistry journal article supplement (doi:10.1039/c7ra08527c), 2017-01-01

## Orientation-Dependent Induced-Charge Electrophoresis of Magnetic Metal-coated Janus Particles with Different Coating Thicknesses: Supplementary information

*Chia-Hsien Lin, Yu-Liang Chen and Hong-Ren Jiang\**

*Institute of Applied Mechanics, National Taiwan University. No.1, Sec. 4, Roosevelt Rd., Da'an Dist., Taipei City 106, Taiwan (R.O.C.)*

**Figure S1:** The monolayer of 3  $\mu\text{m}$  superparamagnetic PS particles.

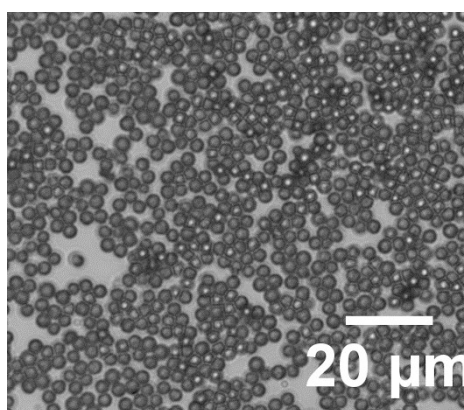

**Figure S2:** The relation between the velocities of magnetic Janus particles and different frequency of the electric field. The positive values indicate motion in the direction of the dielectric side and vice-versa.

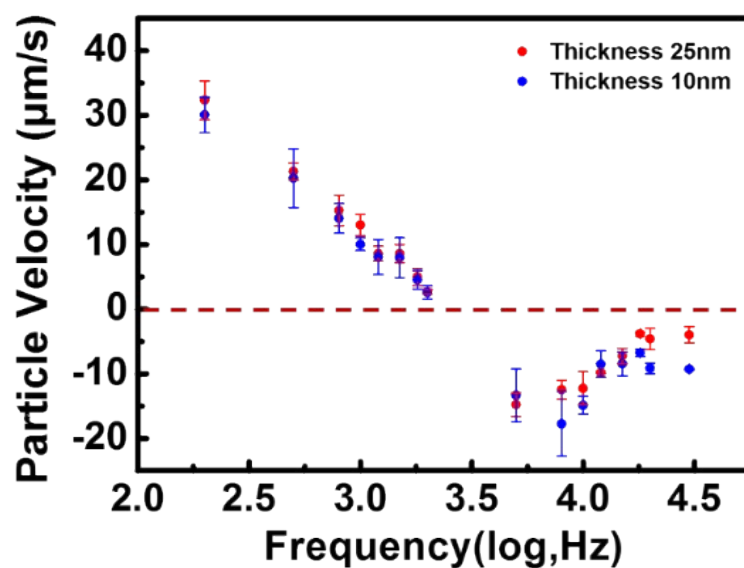

Supplement: c7ra08527c1.pdf [file c7ra08527c1.pdf]
